# Supplementary material for: Blackberry-Loaded AgNPs Attenuate Hepatic Ischemia/Reperfusion Injury via PI3K/Akt/mTOR Pathway
Source: MDPI journal article supplement (doi:10.3390/metabo13030419), 2023-03-13
Supplement: s1 [file s1]

**Supplementary Material**  
**Blackberry-loaded AgNPs Attenuate Hepatic Ischemia/Reperfusion**  
**Injury via PI3K/Akt/mTOR Pathway**

**Ahmed M. Fathi<sup>a</sup>, Shaimaa Waz<sup>a</sup>, Eman Alaaeldin<sup>b, c</sup>, Nisreen D. M. Toni<sup>d</sup>, Ahmed M. Sayed<sup>e</sup>  
Usama Ramadan Abdelmohsen<sup>f, g\*</sup>, Maiiada H. Nazmy<sup>a\*</sup>**

<sup>a</sup> Department of Biochemistry, Faculty of Pharmacy, Minia University, Minia 61519, Egypt

<sup>b</sup> Department of Pharmaceutics, Faculty of Pharmacy, Minia University, Minia 61519, Egypt,

<sup>c</sup> Department of Pharmaceutics, Faculty of Pharmacy, Deraya University, Minia, 61111, Egypt,

<sup>d</sup> Department of Pathology, Faculty of Medicine, Minia University, Minia 61519, Egypt

<sup>e</sup> Department of Pharmacognosy, Faculty of Pharmacy, Nahda University, 62513 Beni-Suef, Egypt.

<sup>f</sup> Department of Pharmacognosy, Faculty of Pharmacy, Minia University, Minia 61519, Egypt

<sup>g</sup> Department of Pharmacognosy, Faculty of Pharmacy, Deraya University, New Minia 61111, Egypt,

**Correspondence: mnazmy@yahoo.com and Usama.ramadan@mu.edu.eg**

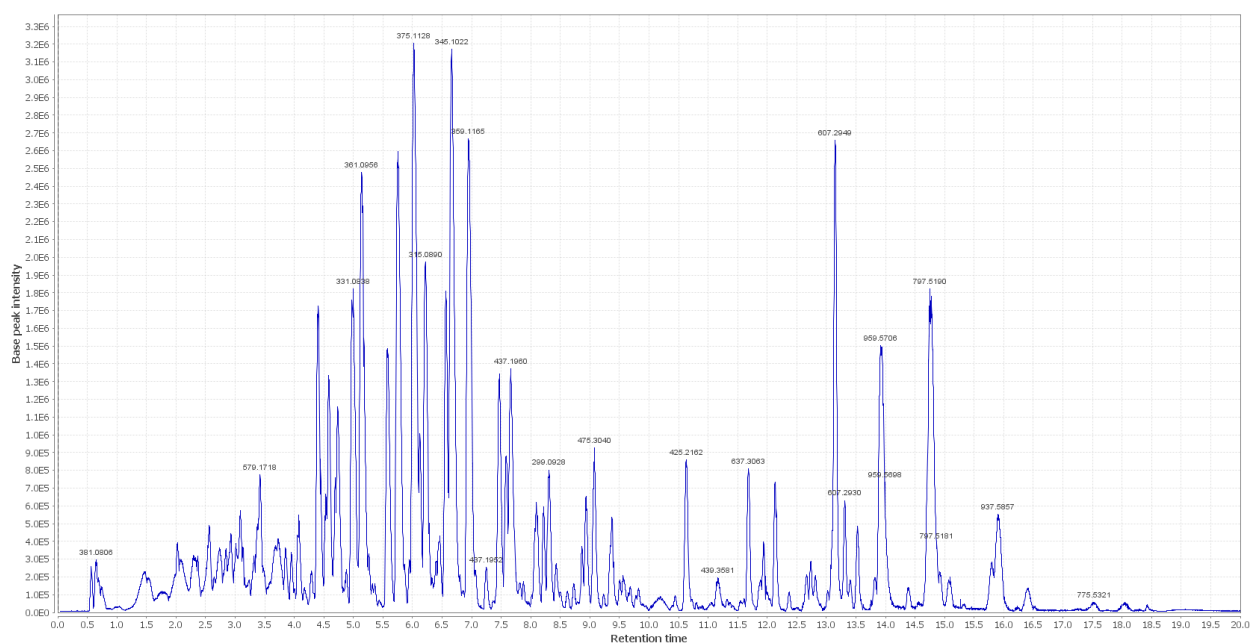

**Figure S1.** Total ion chromatogram of crude extract of Blackberry leaves (Positive mode)

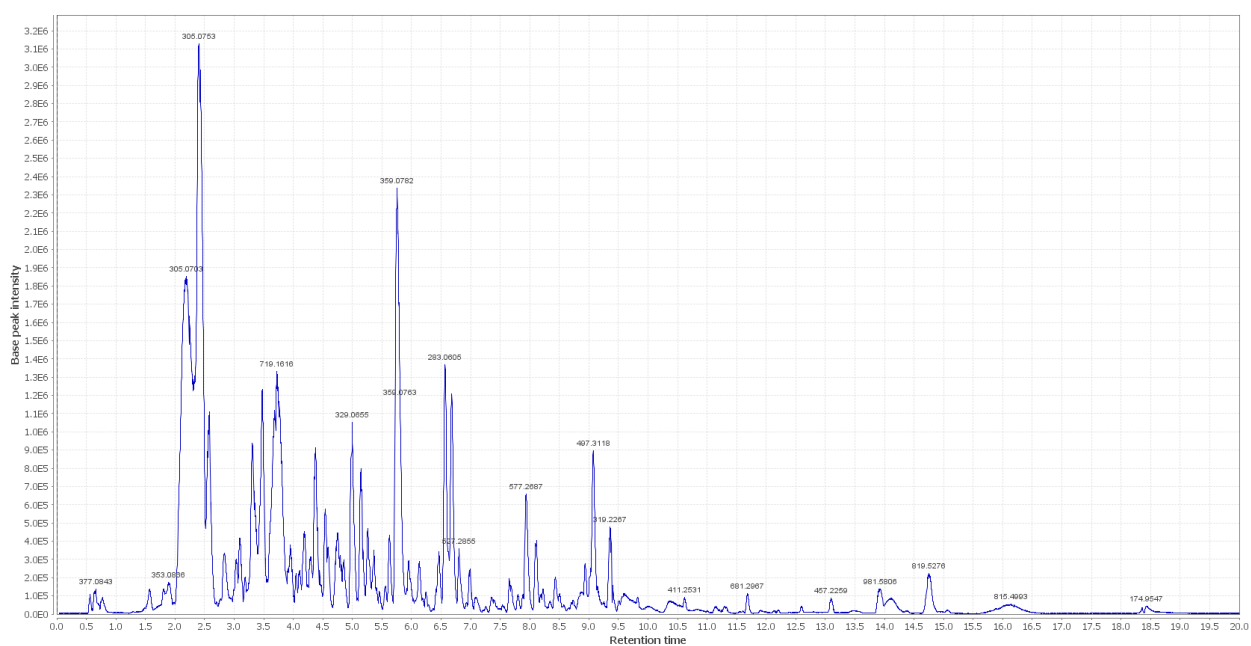

**Figure S2.** Total ion chromatogram of crude extract of Blackberry leaves (Negative mode)

## ALT RESULTS

|                        | Standard 1  | Standard 2 | Standard 3 | Standard 4   | Standard 5           |                     |                  |
|------------------------|-------------|------------|------------|--------------|----------------------|---------------------|------------------|
| <b>Conc</b>            | 0           | 25         | 50         | 83           | 126                  |                     |                  |
| <b>Absorpance</b>      | 0.536       | 0.681      | 0.79       | 0.896        | 1.009                |                     |                  |
| <b>A-BLANK</b>         | 0           | 0.145      | 0.254      | 0.36         | 0.473                |                     |                  |
| <b>Absorbance</b>      |             |            |            |              |                      |                     |                  |
|                        | <b>Sham</b> | <b>IRI</b> | <b>BBE</b> | <b>AgNPs</b> | <b>200 BBE-AgNPs</b> | <b>50 BBE-AgNPs</b> | <b>Silymarin</b> |
| <b>Rat 1</b>           | 0.668       | 1.024      | 0.958      | 1.017        | 0.808                | 0.666               | 0.751            |
| <b>Rat 2</b>           | 0.676       | 1.018      | 0.946      | 1.002        | 0.865                | 0.805               | 0.724            |
| <b>Rat 3</b>           | 0.644       | 1.098      | 0.916      | 0.919        | 0.794                | 0.804               | 0.837            |
| <b>Rat 4</b>           | 0.659       | 1.036      | 0.932      | 1.129        | 0.884                | 0.695               | 0.783            |
| <b>Rat 5</b>           | 0.656       | 1.024      | 0.823      | 0.933        | 0.828                | 0.711               | 0.823            |
| <b>Rat 6</b>           | 0.671       | 1.017      | 0.931      | 1.053        | 0.702                | 0.698               | 0.876            |
| <b>Serum ALT Level</b> |             |            |            |              |                      |                     |                  |
| <b>Conc 1</b>          | 321.9512    | 1190.244   | 1029.26829 | 1173.171     | 663.414634           | 317.07317           | 524.3902         |
| <b>Conc 2</b>          | 341.4634    | 1175.61    | 1000       | 1136.585     | 802.439024           | 656.09756           | 458.5366         |
| <b>Conc 3</b>          | 263.4146    | 1370.732   | 926.829268 | 934.1463     | 629.268293           | 653.65854           | 734.1463         |
| <b>Conc 4</b>          | 300         | 1219.512   | 965.853659 | 1446.341     | 848.780488           | 387.80488           | 602.439          |
| <b>Conc 5</b>          | 292.6829    | 1190.244   | 700        | 968.2927     | 712.195122           | 426.82927           | 700              |
| <b>Conc 6</b>          | 329.2683    | 1173.171   | 963.414634 | 1260.976     | 404.878049           | 395.12195           | 829.2683         |
| <b>Mean</b>            | 308.1301    | 1219.919   | 930.894309 | 1153.252     | 676.829268           | 472.76423           | 641.4634         |
| <b>Std. Deviation</b>  | 28.47154    | 75.7028    | 118.373537 | 189.9461     | 156.840837           | 145.55412           | 138.5486         |
| <b>SEM</b>             | 11.62346    | 30.90554   | 48.3257941 | 77.54517     | 64.0300036           | 59.422219           | 56.56223         |

**Table S1.** Effect of pretreatment with BBE, AgNPs, 200 or 50 BBE-AgNPs and silymarin on serum ALT level in hepatic I/R injured rats. Values are presented as means of 6 animals  $\pm$  SEM. Data were analyzed using one-way ANOVA followed by Tukey's Multiple Comparisons. ALT, alanine transaminase; BBE, Blackberry Extract; IRI, ischemia/reperfusion injury; AgNPs, Silver Nanoparticles; BBE-AgNPs, Blackberry loaded Silver Nanoparticles. Absorbance of samples measured by spectrophotometer at  $\gamma = 505$  nm and concentration of serum ALT of each sample was calculated according to the kit.

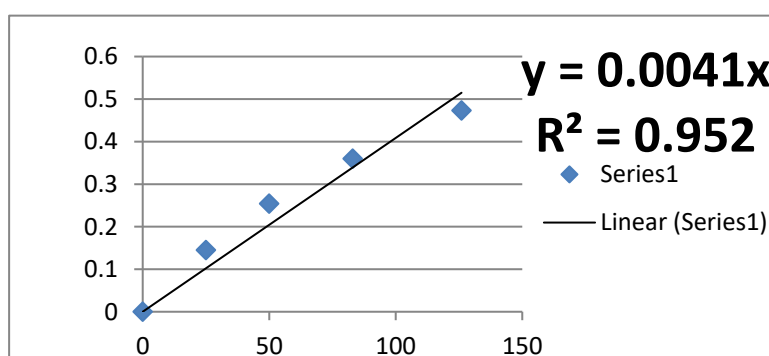

## AST RESULTS

| Conc            | 0        | 22       | 55         | 95       | 150        |           |           |
|-----------------|----------|----------|------------|----------|------------|-----------|-----------|
| Absorptance     | 0.553    | 0.64     | 0.813      | 0.924    | 1.055      |           |           |
| A-BLANK         | 0        | 0.087    | 0.26       | 0.371    | 0.502      |           |           |
| Absorbance      |          |          |            |          |            |           |           |
|                 | Normal   | IRI      | BBE        | Empty    | 200 AgNPs  | 50 AgNPs  | Silymarin |
| Rat 1           | 0.721    | 1.156    | 1.067      | 1.029    | 0.964      | 0.787     | 0.921     |
| Rat 2           | 0.684    | 1.166    | 1.134      | 1.074    | 1.005      | 0.867     | 0.852     |
| Rat 3           | 0.681    | 1.234    | 1.154      | 0.996    | 0.899      | 0.833     | 0.924     |
| Rat 4           | 0.696    | 1.236    | 1.068      | 1.022    | 0.998      | 0.815     | 0.839     |
| Rat 5           | 0.711    | 1.177    | 1.168      | 1.114    | 0.934      | 0.812     | 0.942     |
| Rat 6           | 0.632    | 1.184    | 1.114      | 1.043    | 0.945      | 0.862     | 0.911     |
| Serum ALT Level |          |          |            |          |            |           |           |
| Conc 1          | 466.6667 | 1675     | 1427.77778 | 1322.222 | 1141.66667 | 650       | 1022.222  |
| Conc 2          | 363.8889 | 1702.778 | 1613.88889 | 1447.222 | 1255.55556 | 872.22222 | 830.5556  |
| Conc 3          | 355.5556 | 1891.667 | 1669.44444 | 1230.556 | 961.111111 | 777.77778 | 1030.556  |
| Conc 4          | 397.2222 | 1897.222 | 1430.55556 | 1302.778 | 1236.11111 | 727.77778 | 794.4444  |
| Conc 5          | 438.8889 | 1733.333 | 1708.33333 | 1558.333 | 1058.33333 | 719.44444 | 1080.556  |
| Conc 6          | 219.4444 | 1752.778 | 1558.33333 | 1361.111 | 1088.88889 | 858.33333 | 994.4444  |
| Mean            | 373.6111 | 1775.463 | 1568.05556 | 1370.37  | 1123.61111 | 767.59259 | 958.7963  |
| Std. Deviation  | 86.79389 | 95.91046 | 118.942745 | 116.4107 | 111.592706 | 86.042386 | 117.2396  |
| SEM             | 35.43346 | 39.15528 | 48.5581722 | 47.52445 | 45.5575316 | 35.126657 | 47.86285  |

**Table S2.** Effect of pretreatment with BBE, AgNPs, 200 or 50 BBE-AgNPs and silymarin on serum AST level in hepatic I/R injured rats. Values are presented as means of 6 animals  $\pm$  SEM. Data were analyzed using one-way ANOVA followed by Tukey's Multiple Comparisons. AST, aspartate transaminase; BBE, Blackberry Extract; IRI, ischemia/reperfusion injury; AgNPs, Silver Nanoparticles; BBE-AgNPs, Blackberry loaded Silver Nanoparticles. Absorbance of samples measured by spectrophotometer at  $\gamma = 505$  nm and concentration of serum AST of each sample was calculated according to the kit.

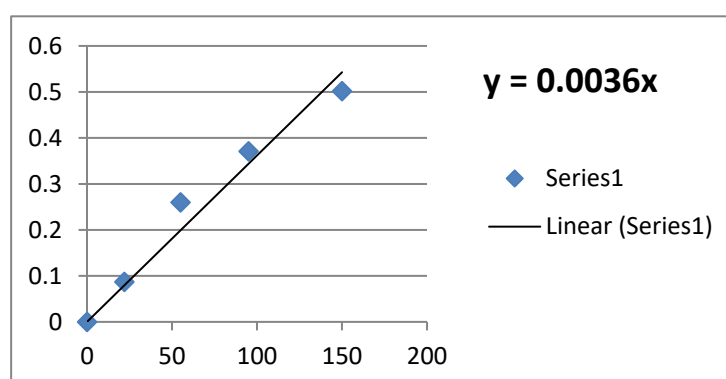

## MDA RESULTS

|                       |                        |            |            |              |                  |                 |                  |
|-----------------------|------------------------|------------|------------|--------------|------------------|-----------------|------------------|
|                       |                        | Standard   | 0.295      | Sample Blank |                  | 0.14            |                  |
|                       |                        | St Blank   | 100        |              |                  |                 |                  |
|                       | <b>Absorbance</b>      |            |            |              |                  |                 |                  |
|                       | <b>Normal</b>          | <b>IRI</b> | <b>BBE</b> | <b>Empty</b> | <b>200 AgNPs</b> | <b>50 AgNPs</b> | <b>Silymarin</b> |
| <b>Rat 1</b>          | 0.505                  | 0.741      | 0.653      | 0.717        | 0.581            | 0.479           | 0.581            |
| <b>Rat 2</b>          | 0.465                  | 0.799      | 0.646      | 0.688        | 0.631            | 0.519           | 0.534            |
| <b>Rat 3</b>          | 0.478                  | 0.722      | 0.583      | 0.694        | 0.585            | 0.525           | 0.488            |
| <b>Rat 4</b>          | 0.527                  | 0.691      | 0.573      | 0.678        | 0.624            | 0.485           | 0.464            |
| <b>Rat 5</b>          | 0.434                  | 0.739      | 0.638      | 0.712        | 0.536            | 0.508           | 0.471            |
| <b>Rat 6</b>          | 0.472                  | 0.731      | 0.564      | 0.652        | 0.611            | 0.537           | 0.468            |
|                       | <b>Liver MDA Level</b> |            |            |              |                  |                 |                  |
| <b>Conc 1</b>         | 309.322                | 509.322    | 434.7458   | 488.9831     | 373.7288         | 287.2881        | 373.7288         |
| <b>Conc 2</b>         | 275.4237               | 558.4746   | 428.8136   | 464.4068     | 416.1017         | 321.1864        | 333.8983         |
| <b>Conc 3</b>         | 286.4407               | 493.2203   | 375.4237   | 469.4915     | 377.1186         | 326.2712        | 294.9153         |
| <b>Conc 4</b>         | 327.9661               | 466.9492   | 366.9492   | 455.9322     | 410.1695         | 292.3729        | 274.5763         |
| <b>Conc 5</b>         | 249.1525               | 507.6271   | 422.0339   | 484.7458     | 335.5932         | 311.8644        | 280.5085         |
| <b>Conc 6</b>         | 281.3559               | 500.8475   | 359.322    | 433.8983     | 399.1525         | 336.4407        | 277.9661         |
|                       |                        |            |            |              |                  |                 |                  |
| <b>Mean</b>           | 286.1985               | 514.5278   | 399.7579   | 457.9903     | 386.3196         | 311.3801        | 304.3584         |
| <b>SEM</b>            | 9.693802               | 13.34889   | 11.9473    | 10.78615     | 10.32042         | 6.794418        | 13.81472         |
| <b>Std. Deviation</b> | 25.64739               | 35.31784   | 31.60958   | 28.53747     | 27.30527         | 17.97634        | 36.55032         |

**Table S3.** Effect of pretreatment with BBE, AgNPs, 200 or 50 BBE-AgNPs and silymarin on tissue MDA level in hepatic I/R injured rats. Values are presented as means of 6 animals  $\pm$  SEM. Data were analyzed using one-way ANOVA followed by Tukey's Multiple Comparisons. MDA, malondialdehyde ; BBE, Blackberry Extract; IRI, ischemia/reperfusion injury; AgNPs, Silver Nanoparticles; BBE-AgNPs, Blackberry loaded Silver Nanoparticles. Absorbance of samples measured by spectrophotometer at  $\gamma = 534$  nm and concentration of tissue MDA of each sample was calculated according to the kit.

## GSH RESULTS

|                       | Absorbance      |          |          |          |           |          |           |
|-----------------------|-----------------|----------|----------|----------|-----------|----------|-----------|
|                       | Normal          | IRI      | BBE      | Empty    | 200 AgNPs | 50 AgNPs | Silymarin |
| <b>Rat 1</b>          | 0.18            | 0.112    | 0.122    | 0.132    | 0.132     | 0.158    | 0.167     |
| <b>Rat 2</b>          | 0.174           | 0.115    | 0.131    | 0.124    | 0.151     | 0.165    | 0.165     |
| <b>Rat 3</b>          | 0.172           | 0.122    | 0.123    | 0.121    | 0.143     | 0.159    | 0.169     |
| <b>Rat 4</b>          | 0.169           | 0.111    | 0.13     | 0.123    | 0.134     | 0.165    | 0.165     |
| <b>Rat 5</b>          | 0.173           | 0.119    | 0.136    | 0.122    | 0.141     | 0.16     | 0.175     |
| <b>Rat 6</b>          | 0.179           | 0.109    | 0.125    | 0.115    | 0.152     | 0.165    | 0.167     |
|                       | Liver GSH Level |          |          |          |           |          |           |
| <b>Conc 1</b>         | 52.614          | 7.326    | 13.986   | 20.646   | 20.646    | 37.962   | 43.956    |
| <b>Conc 2</b>         | 48.618          | 9.324    | 19.98    | 15.318   | 33.3      | 42.624   | 42.624    |
| <b>Conc 3</b>         | 47.286          | 13.986   | 14.652   | 13.32    | 27.972    | 38.628   | 45.288    |
| <b>Conc 4</b>         | 45.288          | 6.66     | 19.314   | 14.652   | 21.978    | 42.624   | 42.624    |
| <b>Conc 5</b>         | 47.952          | 11.988   | 23.31    | 13.986   | 26.64     | 39.294   | 49.284    |
| <b>Conc 6</b>         | 51.948          | 5.328    | 15.984   | 9.324    | 33.966    | 42.624   | 43.956    |
|                       |                 |          |          |          |           |          |           |
| <b>Mean</b>           | 48.80829        | 9.609429 | 18.55286 | 15.12771 | 27.68657  | 40.626   | 44.71714  |
| <b>Std. deviation</b> | 2.599798        | 3.326827 | 3.756236 | 3.68241  | 5.113578  | 2.034664 | 2.288708  |
| <b>SEM</b>            | 0.982631        | 1.257422 | 1.419724 | 1.39182  | 1.932751  | 0.769031 | 0.86505   |

**Table S4.** Effect of pretreatment with BBE, AgNPs, 200 or 50 BBE-AgNPs and silymarin on tissue GSH level in hepatic I/R injured rats. Values are presented as means of 6 animals  $\pm$  SEM. Data were analyzed using one-way ANOVA followed by Tukey's Multiple Comparisons. GSH, reduced glutathione ; BBE, Blackberry Extract; IRI, ischemia/reperfusion injury; AgNPs, Silver Nanoparticles; BBE-AgNPs, Blackberry loaded Silver Nanoparticles. Absorbance of samples measured by spectrophotometer at  $\gamma = 405$  nm and concentration of tissue GSH of each sample was calculated according to the kit.

## SOD RESULTS

|        | Absorbance |                    |          |          |           |          |           |
|--------|------------|--------------------|----------|----------|-----------|----------|-----------|
|        | Normal     | IRI                | BBE      | Empty    | 200 AgNPs | 50 AgNPs | Silymarin |
| Rat 1  | 28         | 73                 | 37       | 68       | 45        | 34       | 28        |
| Rat 2  | 30         | 82                 | 64       | 58       | 53        | 38       | 29        |
| Rat 3  | 22         | 79                 | 63       | 60       | 50        | 25       | 27        |
| Rat 4  | 38         | 74                 | 54       | 62       | 62        | 37       | 33        |
| Rat 5  | 33         | 87                 | 48       | 76       | 54        | 40       | 39        |
| Rat 6  | 29         | 73                 | 64       | 66       | 60        | 30       | 30        |
|        |            | % Inhibition       |          |          |           |          |           |
| Conc 1 | 77.6       | 41.6               | 70.4     | 45.6     | 64        | 72.8     | 77.6      |
| Conc 2 | 76         | 34.4               | 48.8     | 53.6     | 57.6      | 69.6     | 76.8      |
| Conc 3 | 82.4       | 36.8               | 49.6     | 52       | 60        | 80       | 78.4      |
| Conc 4 | 69.6       | 40.8               | 56.8     | 50.4     | 50.4      | 70.4     | 73.6      |
| Conc 5 | 73.6       | 30.4               | 61.6     | 39.2     | 56.8      | 68       | 68.8      |
| Conc 6 | 76.8       | 41.6               | 48.8     | 47.2     | 52        | 76       | 76        |
|        |            | Liver SOD Activity |          |          |           |          |           |
|        | Normal     | IRI                | BBE      | Empty    | 200 AgNPs | 50 AgNPs | Silymarin |
|        | 291        | 156                | 264      | 171      | 240       | 273      | 291       |
|        | 285        | 129                | 183      | 201      | 216       | 261      | 288       |
|        | 309        | 138                | 186      | 195      | 225       | 300      | 294       |
|        | 261        | 153                | 213      | 189      | 189       | 264      | 276       |
|        | 276        | 114                | 231      | 147      | 213       | 255      | 258       |
|        | 288        | 156                | 183      | 177      | 195       | 285      | 285       |
| Mean   | 285        | 141                | 210      | 180      | 213       | 273      | 282       |
| SEM    | 6.526868   | 7.014271           | 13.41641 | 8.01249  | 7.70714   | 6.884766 | 5.422177  |
| St Dev | 15.9875    | 17.18139           | 32.86335 | 19.62651 | 18.87856  | 16.86416 | 13.28157  |

**Table S5.** Effect of pretreatment with BBE, AgNPs, 200 or 50 BBE-AgNPs and silymarin on tissue SOD activity in hepatic I/R injured rats. Values are presented as means of 6 animals  $\pm$  SEM. Data were analyzed using one-way ANOVA followed by Tukey's Multiple Comparisons. SOD, superoxide dismutase ; BBE, Blackberry Extract; IRI, ischemia/reperfusion injury; AgNPs, Silver Nanoparticles; BBE-AgNPs, Blackberry loaded Silver Nanoparticles. Absorbance of samples measured by spectrophotometer at  $\gamma = 560$  nm and activity of tissue SOD of each sample was calculated according to the kit.

## CAT RESULTS

|                       | Absorbance                |          |          |          |           |          |           |
|-----------------------|---------------------------|----------|----------|----------|-----------|----------|-----------|
|                       | Normal                    | IRI      | BBE      | Empty    | 200 AgNPs | 50 AgNPs | Silymarin |
| <b>Rat 1</b>          | 0.861                     | 0.712    | 0.765    | 0.769    | 0.806     | 0.825    | 0.858     |
| <b>Rat 2</b>          | 0.852                     | 0.722    | 0.736    | 0.793    | 0.784     | 0.831    | 0.843     |
| <b>Rat 3</b>          | 0.881                     | 0.728    | 0.777    | 0.786    | 0.812     | 0.811    | 0.854     |
| <b>Rat 4</b>          | 0.877                     | 0.731    | 0.734    | 0.813    | 0.818     | 0.829    | 0.862     |
| <b>Rat 5</b>          | 0.849                     | 0.736    | 0.764    | 0.782    | 0.799     | 0.823    | 0.863     |
| <b>Rat 6</b>          | 0.859                     | 0.728    | 0.762    | 0.775    | 0.804     | 0.812    | 0.852     |
|                       | <b>Liver CAT Activity</b> |          |          |          |           |          |           |
| <b>Conc 1</b>         | 56.09137                  | 18.27411 | 31.72589 | 32.74112 | 42.13198  | 46.95431 | 55.32995  |
| <b>Conc 2</b>         | 53.80711                  | 20.81218 | 24.36548 | 38.83249 | 36.54822  | 48.47716 | 51.52284  |
| <b>Conc 3</b>         | 61.16751                  | 22.33503 | 34.77157 | 37.05584 | 43.65482  | 43.40102 | 54.31472  |
| <b>Conc 4</b>         | 60.15228                  | 23.09645 | 23.85787 | 43.90863 | 45.17766  | 47.96954 | 56.34518  |
| <b>Conc 5</b>         | 53.04569                  | 24.36548 | 31.47208 | 36.04061 | 40.35533  | 46.4467  | 56.59898  |
| <b>Conc 6</b>         | 55.58376                  | 22.33503 | 30.96447 | 34.26396 | 41.62437  | 43.65482 | 53.80711  |
|                       |                           |          |          |          |           |          |           |
| <b>Mean</b>           | 57.7955                   | 21.79115 | 28.97027 | 36.62074 | 42.05946  | 45.97534 | 55.22117  |
| <b>Std. Deviation</b> | 4.304043                  | 1.935316 | 4.280818 | 3.848378 | 2.998486  | 2.022131 | 2.283592  |
| <b>SEM</b>            | 1.626776                  | 0.731481 | 1.617997 | 1.45455  | 1.133321  | 0.764294 | 0.863117  |

**Table S6.** Effect of pretreatment with BBE, AgNPs, 200 or 50 BBE-AgNPs and silymarin on tissue CAT activity in hepatic I/R injured rats. Values are presented as means of 6 animals  $\pm$  SEM. Data were analyzed using one-way ANOVA followed by Tukey's Multiple Comparisons. CAT, catalase ; BBE, Blackberry Extract; IRI, ischemia/reperfusion injury; AgNPs, Silver Nanoparticles; BBE-AgNPs, Blackberry loaded Silver Nanoparticles. Absorbance of samples measured by spectrophotometer at  $\gamma = 510$  nm and activity of tissue CAT of each sample was calculated according to the kit.



## WESTERN BLOTTING

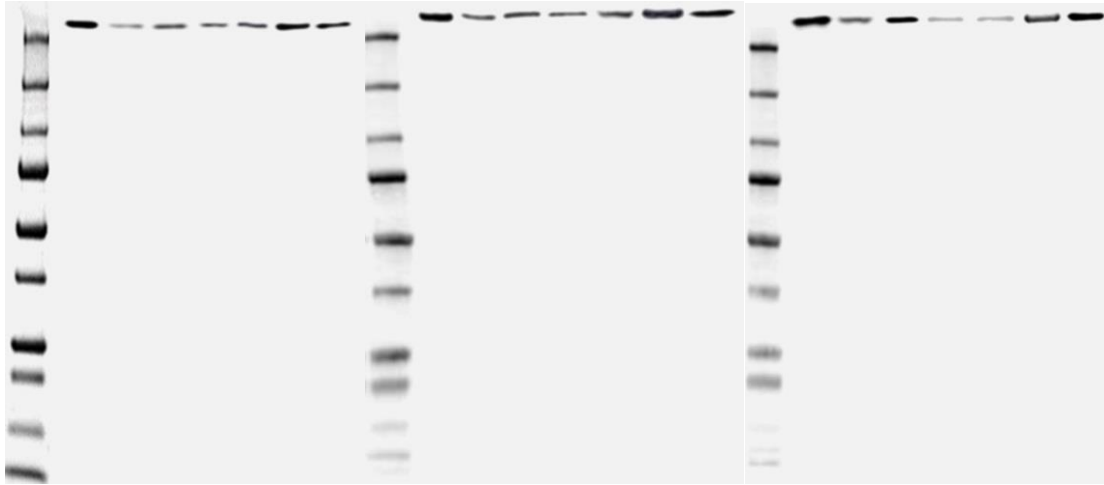

**Figure S3.** Western blotting of p-mTOR original images

---

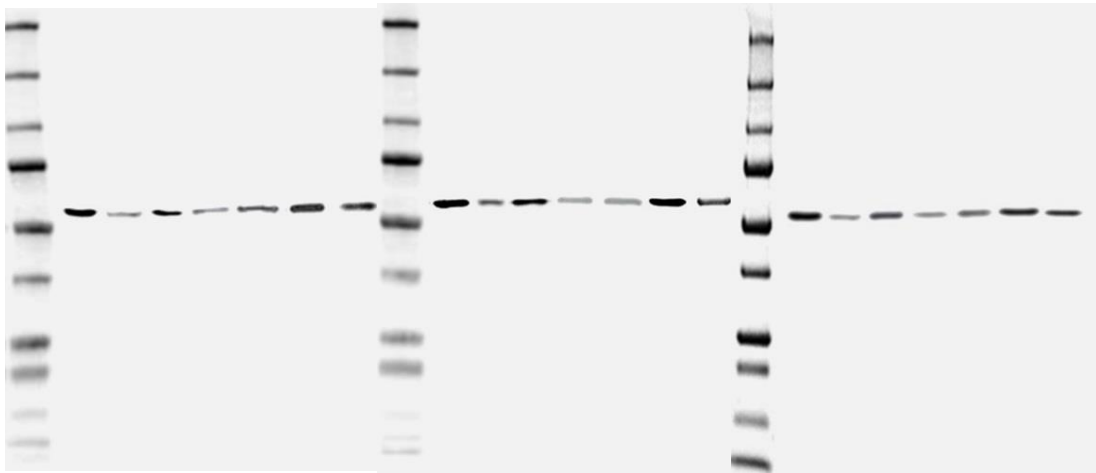

**Figure S4.** Western blotting of p-Akt original images

---

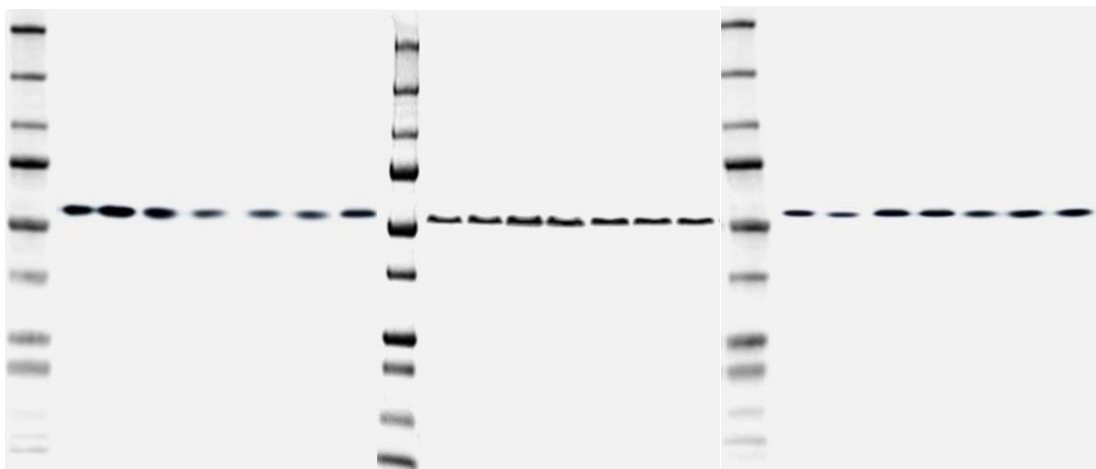

**Figure S5.** Western blotting Akt original images

---

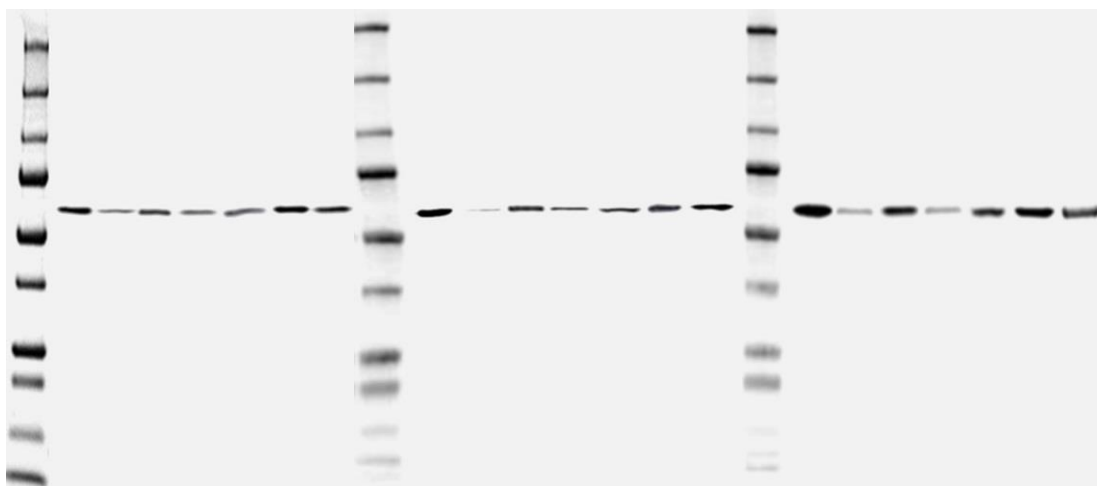

**Figure S6.** Western blotting of p-PI3k original images

---

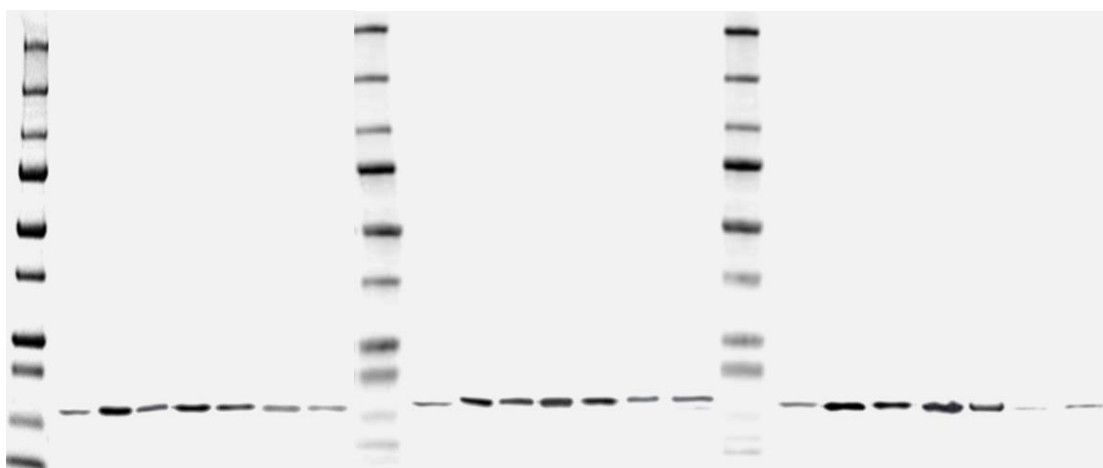

**Figure S7.** Western blotting of Cleaved Caspase-3 original images

---

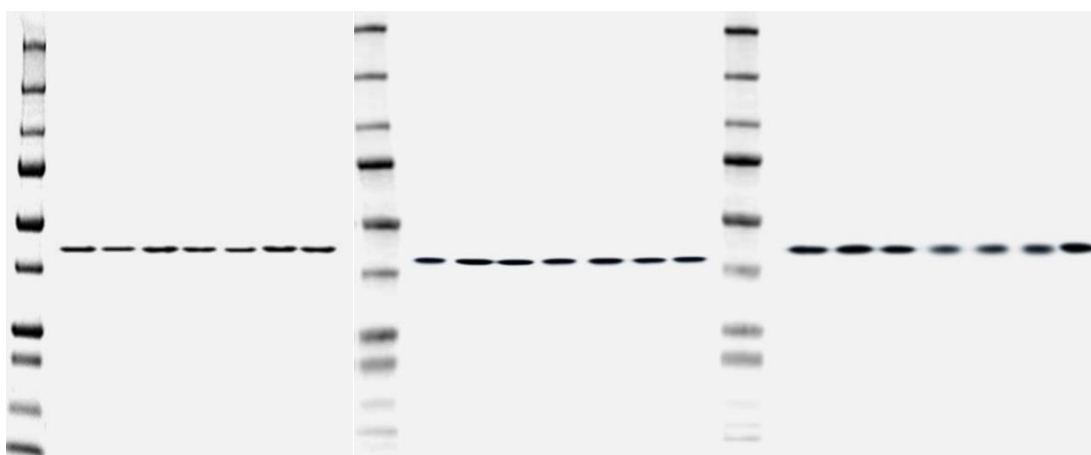

**Figure S8.** Western blotting of B-Actin original images

---

## IMMUNOHISTOCHEMISTRY

### % Area of Positive Bax Staining

|                | Sham   | IRI    | BBE    | AgNPs  | 200 BBE-AgNPs | 50 BBE-AgNPs | Silymarin |
|----------------|--------|--------|--------|--------|---------------|--------------|-----------|
| Rat 1          | 2.1    | 12.7   | 6.6    | 10.3   | 5.5           | 2.4          | 3.4       |
| Rat 2          | 1.5    | 12.9   | 6      | 11.1   | 4.2           | 3.4          | 2         |
| Rat 3          | 1.2    | 12.5   | 7      | 12     | 3.5           | 4.5          | 1.5       |
| Rat 4          | 0.7    | 12.2   | 6.1    | 9.1    | 3.8           | 1.8          | 2.8       |
| Rat 5          | 1.7    | 11.5   | 5.9    | 10.2   | 4             | 3            | 1.6       |
| Rat 6          | 1.3    | 11.1   | 7.2    | 13.3   | 5.3           | 3.1          | 2.5       |
|                |        |        |        |        |               |              |           |
| Mean           | 1.417  | 12.15  | 6.467  | 11.00  | 4.383         | 3.033        | 2.300     |
| SEM            | 0.1939 | 0.2895 | 0.2246 | 0.6066 | 0.3361        | 0.3748       | 0.3011    |
| Std. Deviation | 0.4750 | 0.7092 | 0.5502 | 1.486  | 0.8232        | 0.9180       | 0.7376    |

**Table S7.** Effect of pretreatment with BBE, AgNPs, 200 or 50 BBE-AgNPs and silymarin on the expression of Bax in hepatic I/R injured rats. Values are presented as means of 6 animals  $\pm$  SEM. Data were analyzed using one-way ANOVA followed by Tukey's Multiple Comparisons. Bax, BCL2-Associated X Protein; BBE, Blackberry Extract; IRI, ischemia/reperfusion injury; AgNPs, Silver Nanoparticles; BBE-AgNPs, Blackberry loaded Silver Nanoparticles. **Percentage area of positive Bax staining was measured by the programme Image J.**

### % Area of Positive Caspase-9 Staining

|                | Sham   | IRI    | BBE    | AgNPs  | 200 BBE-AgNPs | 50 BBE-AgNPs | Silymarin |
|----------------|--------|--------|--------|--------|---------------|--------------|-----------|
| Rat 1          | 0.4    | 14.5   | 7      | 10.1   | 6.7           | 3.2          | 0.9       |
| Rat 2          | 1.1    | 13.4   | 6.3    | 11     | 5             | 4.5          | 1         |
| Rat 3          | 0.2    | 13     | 10.2   | 11.2   | 4.3           | 4.7          | 3.3       |
| Rat 4          | 1.4    | 13.2   | 9.3    | 13.7   | 4.7           | 4.8          | 2         |
| Rat 5          | 2.7    | 12     | 6.5    | 11.4   | 5.2           | 5.4          | 4.3       |
| Rat 6          | 0.5    | 12.4   | 5.5    | 12     | 5.6           | 3.6          | 1.7       |
|                |        |        |        |        |               |              |           |
| Mean           | 1.050  | 13.08  | 7.467  | 11.57  | 5.250         | 4.367        | 2.200     |
| SEM            | 0.3784 | 0.3544 | 0.7575 | 0.4958 | 0.3413        | 0.3333       | 0.5489    |
| Std. Deviation | 0.9268 | 0.8681 | 1.855  | 1.214  | 0.8361        | 0.8165       | 1.345     |

**Table S8.** Effect of pretreatment with BBE, AgNPs, 200 or 50 BBE-AgNPs and silymarin on the expression of Caspase-9 in hepatic I/R injured rats. Values are presented as means of 6 animals  $\pm$  SEM. Data were analyzed using one-way ANOVA followed by Tukey's Multiple Comparisons. BBE, Blackberry Extract; IRI, ischemia/reperfusion injury; AgNPs, Silver Nanoparticles; BBE-AgNPs, Blackberry loaded Silver Nanoparticles. **Percentage area of positive Caspase-9 staining was measured by the programme Image J.**

## Methods

### 1. Molecular Dynamics Simulation

Desmond v. 2.2 software was used for performing MDS experiments [1-3]. This software applies the OPLS force field. Protein systems were built using the System Builder option, where the protein structure was embedded in an orthorhombic box of TIP3P water together with 0.15 M Na<sup>+</sup> and Cl<sup>-</sup> ions in a 20 Å<sup>3</sup> solvent buffer. Afterward, the prepared systems were energy minimized and equilibrated for 10 ns. Desmond software automatically parameterizes inputted ligands during the system-building step according to the OPLS force field. Metal-containing proteins like PLA<sub>2</sub> that contain Ca<sup>2+</sup> ion in the active site should be parameterized during the protein preparation step. To do so, a hetero state should be generated for hetero atoms like Ca (Generate Hetero States). This function is a part of the maestro's Protein Preparation wizard. This step will enable the formation of a suitable hetero state or co-ordinate covalent state for the heteroatom (i.e. Ca<sup>2+</sup>) in complex with the protein so that force fields like OPLS can easily recognize the zinc atom.

For simulations performed by NAMD [4], the parameters and topologies of the compounds were calculated either using the Charmm27 force field with the online software Ligand Reader and Modeler (<http://www.charmm-gui.org/?doc=input/ligandrm>, accessed on 4 September 2022) [5] or using the VMD plugin Force Field Toolkit (ffTK). Afterward, the generated parameters and topology files were loaded to VMD to readily read the protein-ligand complexes without errors and then conduct the simulation step. Harmonic Tcl forces were applied to keep Ca<sup>2+</sup> in place.

### 2. Binding Free Energy Calculations

Binding free energy calculations ( $\Delta G_{\text{binding}}$ ) were performed using the free energy perturbation (FEP) method [4]. This method was described in detail in a recent article by Kim and coworkers [4]. Briefly, this method calculates the binding free energy  $\Delta G_{\text{binding}}$  according to the following equation:  $\Delta G_{\text{binding}} = \Delta G_{\text{Complex}} - \Delta G_{\text{Ligand}}$ . The value of each  $\Delta G$  is estimated from a separate simulation using NAMD software. Interestingly, all input files required for simulation by NAMD can be papered by using the online website CharmmGUI (<https://charmm-gui.org/?doc=input/afes.abinding>, accessed on 18 September 2022). Subsequently, we can use these files in NAMD to produce the required simulations using the FEP calculation function in NAMD. The equilibration was achieved in the NPT ensemble at 310 K and 1 atm (1.01325 bar) with Langevin piston pressure (for “Complex” and “Ligand”) in the presence of the TIP3P water model. Then, 10 ns FEP simulations were performed for each compound, and the last 5 ns of the free energy values were measured for the final free energy values [4]. Finally, the generated trajectories were visualized and analyzed using VMD software [5].

## References

1. Bowers, K.J., et al. *Scalable algorithms for molecular dynamics simulations on commodity clusters*. in *Proceedings of the 2006 ACM/IEEE Conference on Supercomputing*. 2006.
2. Release, S., 3: *Desmond molecular dynamics system*, DE Shaw research, New York, NY, 2017. Maestro-Desmond Interoperability Tools, Schrödinger, New York, NY, 2017.
3. Phillips, J.C., et al., *Scalable molecular dynamics with NAMD*. Journal of computational chemistry, 2005. **26**(16): p. 1781-1802.
4. Kim, S., et al., *CHARMM-GUI free energy calculator for absolute and relative ligand solvation and binding free energy simulations*. Journal of chemical theory and computation, 2020. **16**(11): p. 7207-7218.
5. Ngo, S.T., et al., *Benchmark of popular free energy approaches revealing the inhibitors binding to SARS-CoV-2 Mpro*. Journal of chemical information and modeling, 2021. **61**(5): p. 2302-2312.
